# Supplementary material for: Cosmic radiation exposure and persistent cognitive dysfunction
Source: PubMed Central journal article supplement (PMC5056393; doi:10.1038/srep34774), 2016-10-10
Supplement: srep34774-s1.pdf [file srep34774-s1.pdf]

## **Supplementary Information**

### **Cosmic radiation exposure and persistent cognitive dysfunction**

Vipan K. Parihar<sup>1</sup>, Barrett D. Allen<sup>1</sup>, Chongshan Caressi<sup>1</sup>, Stephanie Kwok<sup>1</sup>, Esther Chu<sup>1</sup>,  
Katherine K. Tran<sup>1</sup>, Nicole N. Chmielewski<sup>1</sup>, Erich Giedzinski<sup>1</sup>, Munjal M. Acharya<sup>1</sup>,  
Richard A. Britten<sup>2</sup>, Janet E. Baulch<sup>1</sup> and Charles L. Limoli<sup>1,\*</sup>

<sup>1</sup>Department of Radiation Oncology, University of California, Irvine, CA 92697-2695,  
USA

<sup>2</sup>Department of Radiation Oncology, Eastern Virginia Medical School, Norfolk, VA  
23507

**Table S1A:** In the Novel Object Recognition (NOR) task, control mice displayed a clear preference for exploring the novel object over the familiar object, an effect not found with the irradiated cohorts. During the test phase, mice spent 68% of their time exploring the novel object.

| <b>Treatment</b>        | <b>Time Spent Exploring Novel Object (Sec.)</b> | <b>Time Spent Exploring Familiar Object (Sec.)</b> | <b>Total Exploration Time (Sec.)</b> |
|-------------------------|-------------------------------------------------|----------------------------------------------------|--------------------------------------|
| 0 Gy                    | 25.90± 2.6                                      | 16.60±2.1                                          | 42.50±6.7                            |
| <sup>16</sup> O 5 cGy   | 19.00±4.3                                       | 15.20±2.3                                          | 34.20± 5.8                           |
| <sup>16</sup> O 30 cGy  | 18.00±4.5                                       | 12.00±2.1                                          | 30.00±5.3                            |
| <sup>48</sup> Ti 5 cGy  | 14.00± 3.4                                      | 13.00±5.5                                          | 27.00± 3.1                           |
| <sup>48</sup> Ti 30 cGy | 11.30±2.8                                       | 12.00±3.5                                          | 23.30± 4.4                           |

**Table S1B:** In the Object in Place (OiP) task, control mice exhibited a strong preference for the objects placed at novel locations. Irradiated groups showed almost no preference for any of the objects and exhibited significant decrements compared with sham-irradiated controls.

| <b>Treatment</b>        | <b>Time Spent Exploring Objects at Novel location (Sec.)</b> | <b>Time Spent Exploring Objects at Familiar location (Sec.)</b> | <b>Total Exploration Time (Sec.)</b> |
|-------------------------|--------------------------------------------------------------|-----------------------------------------------------------------|--------------------------------------|
| 0 Gy                    | 34.00± 4.5                                                   | 24.00±3.6                                                       | 58.00±4.9                            |
| <sup>16</sup> O 5 cGy   | 18.00±4.3                                                    | 16.00±3.9                                                       | 34.00±4.1                            |
| <sup>16</sup> O 30 cGy  | 25.50±2.7                                                    | 23.00±5.6                                                       | 48.50±4.7                            |
| <sup>48</sup> Ti 5 cGy  | 16.00±3.3                                                    | 15.00± 4.5                                                      | 31.00±7.7                            |
| <sup>48</sup> Ti 30 cGy | 20.00±3.9                                                    | 23.00± 4.7                                                      | 43.00±6.7                            |

**Table S1C:** In the Temporal Order (TO) task, cosmic radiation exposure impaired recency memory that was evident by the reduced preference for the object presented prior to the last (i.e., sample object 1).

| <b>Treatment</b>        | <b>Time Spent Exploring Object from sample 1 (less recent) (Sec.)</b> | <b>Time Spent Exploring Object from sample 1 (Sec.)</b> | <b>Total Exploration Time (Sec.)</b> |
|-------------------------|-----------------------------------------------------------------------|---------------------------------------------------------|--------------------------------------|
| 0 Gy                    | 23.00±2.1                                                             | 10.50±2.1                                               | 33.50±4.3                            |
| <sup>16</sup> O 5 cGy   | 10.00±3.3                                                             | 15.00±5.2                                               | 25.00±5.4                            |
| <sup>16</sup> O 30 cGy  | 14.30±3.0                                                             | 13.80±3.8                                               | 28.10±6.3                            |
| <sup>48</sup> Ti 5 cGy  | 12.50±4.9                                                             | 13.00±3.9                                               | 25.50±4.3                            |
| <sup>48</sup> Ti 30 cGy | 14.80±3.9                                                             | 12.70±3.2                                               | 27.50±5.3                            |

**Table S2A:** Cosmic radiation significantly impairs novel object recognition in mice 24 weeks following irradiation. Irradiated mice showed significantly reduced preference for the novel object as compared to non-irradiated controls.

| <b>Treatment</b>        | <b>Time Spent Exploring Novel Object (Sec.)</b> | <b>Time Spent Exploring Familiar Object (Sec.)</b> | <b>Total Exploration Time (Sec.)</b> |
|-------------------------|-------------------------------------------------|----------------------------------------------------|--------------------------------------|
| 0 Gy                    | 28.00±3.2                                       | 15.00±2.1                                          | 43.00±4.1                            |
| <sup>16</sup> O 5 cGy   | 17.90±3.2                                       | 12.00±3.2                                          | 29.90±5.3                            |
| <sup>16</sup> O 30 cGy  | 18.00±4.2                                       | 10.20±5.4                                          | 28.20±3.0                            |
| <sup>48</sup> Ti 5 cGy  | 15.00±5.4                                       | 16.00±3.3                                          | 31.00±3.9                            |
| <sup>48</sup> Ti 30 cGy | 15.00±2.1                                       | 17.60±3.4                                          | 32.60±5.1                            |

**Table S2B:** Cosmic radiation impaired acquisition and retrieval of object-in-place performance that was evident by a reduced preference for objects at novel locations.

| <b>Treatment</b>        | <b>Time Spent Exploring Objects at Novel location (Sec.)</b> | <b>Time Spent Exploring Objects at Familiar location (Sec.)</b> | <b>Total Exploration Time (Sec.)</b> |
|-------------------------|--------------------------------------------------------------|-----------------------------------------------------------------|--------------------------------------|
| 0 Gy                    | 41.00± 3.2                                                   | 23.00± 2.8                                                      | 64.00±4.9                            |
| <sup>16</sup> O 5 cGy   | 28.20±3.3                                                    | 22.10±5.1                                                       | 50.30±6.9                            |
| <sup>16</sup> O 30 cGy  | 32.60±3.2                                                    | 30.0±4.3                                                        | 62.60±8.9                            |
| <sup>48</sup> Ti 5 cGy  | 31.00±4.1                                                    | 33.00±3.2                                                       | 64.00±9.8                            |
| <sup>48</sup> Ti 30 cGy | 28.00±5.1                                                    | 30.00±4.2                                                       | 58.00±7.1                            |

**Table S2C:** Cosmic radiation impaired recency memory that was evident by the reduced preference for the object presented prior to the last.

| <b>Treatment</b>        | <b>Time Spent Exploring Object from sample 1 (less recent) (Sec.)</b> | <b>Time Spent Exploring Object from sample 1 (Sec.)</b> | <b>Total Exploration Time (Sec.)</b> |
|-------------------------|-----------------------------------------------------------------------|---------------------------------------------------------|--------------------------------------|
| 0 Gy                    | 13.00±2.1                                                             | 8.00±2.1                                                | 21.00±5.1                            |
| <sup>16</sup> O 5 cGy   | 12.00±3.2                                                             | 11.60±3.2                                               | 23.60±7.9                            |
| <sup>16</sup> O 30 cGy  | 8.50±2.2                                                              | 9.00±3.2                                                | 17.50±7.1                            |
| <sup>48</sup> Ti 5 cGy  | 9.00±4.3                                                              | 9.40±4.3                                                | 18.40±6.5                            |
| <sup>48</sup> Ti 30 cGy | 7.50±3.2                                                              | 7.20± 4.3                                               | 14.70±5.5                            |

**Table S3:** Baseline freezing (Sec.) during fear conditioning and extinction training

| Treatment | Fear Consolidation | Extinction Trial (0-5) | Extinction Trial (6-10) | Extinction Trial (11-15) |
|-----------|--------------------|------------------------|-------------------------|--------------------------|
| 0 Gy      | 4.05±0.82          | 4.78 ±0.48             | 4.23±0.56               | 3.68±0.67                |
| Ti 30 cGy | 6.30± 1.08         | 6.38±0.58              | 5.26±0.70               | 4.54± 0.57               |

**Table S4A:** The number of entries and ratio of the number of entries (closed:open arms). The effects of cosmic radiation on anxiety were determined using an **Elevated Plus Maze (EPM)**. Irradiation enhances anxiety-like behavior as demonstrated by the reduced numbers of entries into open arms when compared to controls.

| <b>Treatment</b>        | <b>Number of Entries to Closed Arms</b> | <b>Number of Entries to Open Arms</b> | <b>Ratio Time Spent (Close/Open Arms)</b> |
|-------------------------|-----------------------------------------|---------------------------------------|-------------------------------------------|
| 0 Gy                    | 19.35±0.94                              | 12.78±0.71                            | 1.51                                      |
| <sup>48</sup> Ti 30 cGy | 21.37±2.03                              | 9.37 ± 0.85                           | 2.28                                      |

**Table S4B:** The time spent and ratio of the time spent (closed:open arms). Cosmic radiation exposure reduces the preference for the open-arms, as irradiated mice prefer to remain in the darker, closed arms.

| <b>Treatment</b>        | <b>Time spent in Closed Arms (Sec.)</b> | <b>Time Spent in Open Arms (Sec.)</b> | <b>Ratio Time Spent (Close/Open Arms)</b> |
|-------------------------|-----------------------------------------|---------------------------------------|-------------------------------------------|
| 0 Gy                    | 204.53±11.92                            | 103.82± 3.39                          | 1.97                                      |
| <sup>48</sup> Ti 30 cGy | 217±5.84                                | 76.00±6.5                             | 2.86                                      |
